# Supplementary material
Source: publisher site journal article supplement (https://www.oncotarget.com/article/28500)
Supplement: Supplementary file 1 [file 28500]

## Addendum

**Addendum: Value of chemotherapy post immunotherapy in stage IV non-small cell lung cancer (NSCLC)****Hazem I. Assi<sup>1,\*</sup>, Maroun Bou Zerdan<sup>1,\*</sup>, Mohammad Hodroj<sup>1</sup>, Makram Khoury<sup>2</sup>, Nour Sabiha Naji<sup>1</sup>, Ghid Amhaz<sup>1</sup>, Reine Abou Zeidane<sup>1</sup> and Fadi El Karak<sup>2</sup>**<sup>1</sup>Department of Internal Medicine, Division of Hematology and Oncology, Naef K. Basile Cancer Institute, American University of Beirut Medical Center, Beirut, Lebanon<sup>2</sup>Department of Internal Medicine, Division of Hematology and Oncology, Hotel Dieu de France University Hospital, Beirut, Lebanon

\*These authors contributed equally to this work

**Published:****Copyright:** © 2023 Assi et al. This is an open access article distributed under the terms of the [Creative Commons Attribution License](#) (CC BY 4.0), which permits unrestricted use, distribution, and reproduction in any medium, provided the original author and source are credited.**This article has an addendum:** No funding was used for this publication.Original article: Oncotarget. 2023; 14:517–525. <https://doi.org/10.18632/oncotarget.28444>
